# Supplementary material for: Integrated Management of Clubroot in Zhejiang Province, China
Source: MDPI journal article supplement (doi:10.3390/agronomy14020377), 2024-02-15
Supplement: s1 [file s1]

## Supplementary Materials

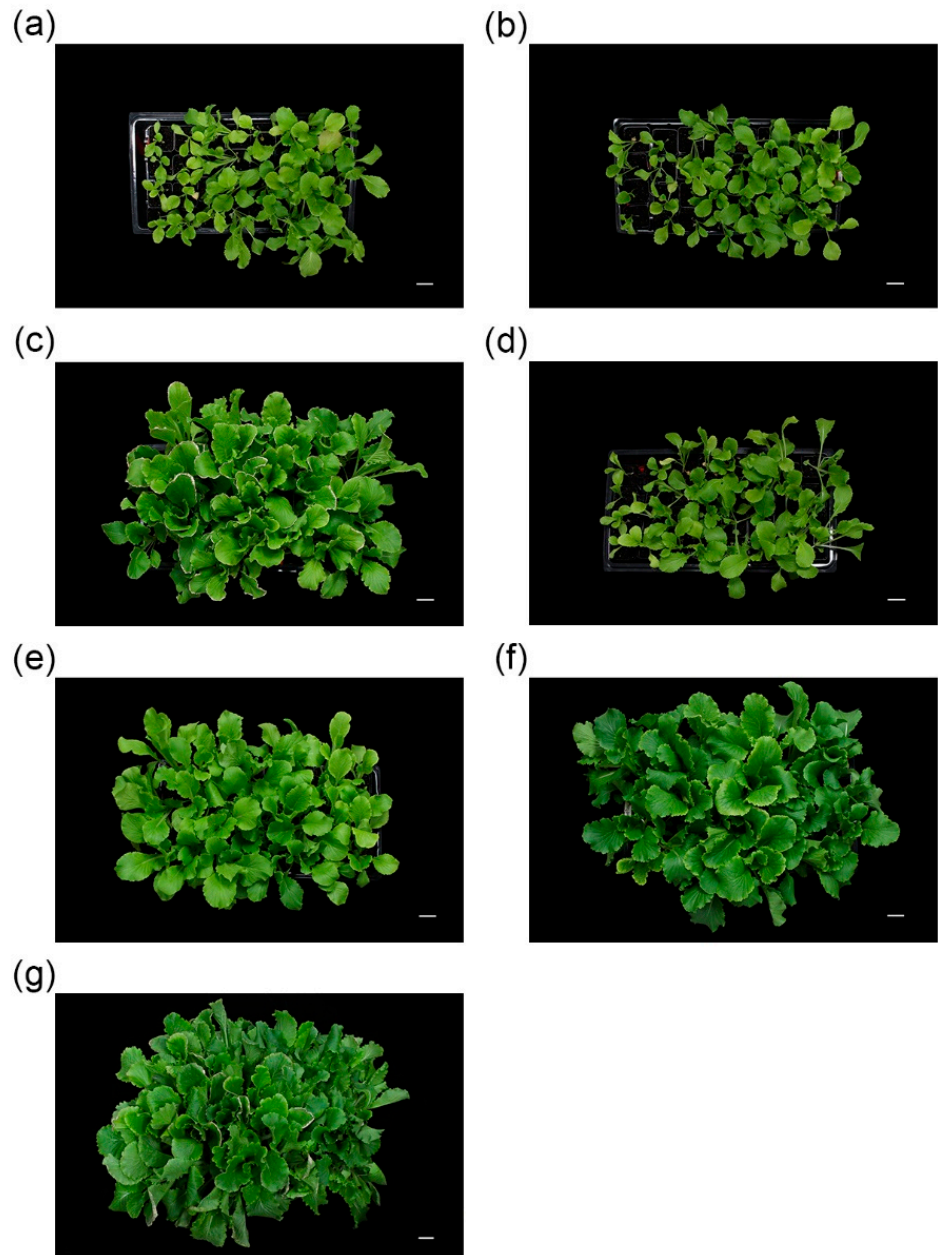

**Figure S1.** Clubroot resistance assay on Chinese cabbage 'Grannat' under CK (a) and treatments of plastic film covering (b), calcium cyanamide at 90 g/m<sup>2</sup> (c), chloroisobromimne cyanuric acid at 4.5 g/m<sup>2</sup> (d), dazomet at 37.5 g/m<sup>2</sup> (e), and ammonium bicarbonate at 150 g/m<sup>2</sup> (f) in greenhouse conditions (22 ± 2°C day/18 ± 2°C night, 16 h photoperiod with 300 μmol·m<sup>-2</sup>·s<sup>-1</sup>). (g) represents a 150 g/m<sup>2</sup> ammonium bicarbonate treatment at a higher temperature (32 ± 2°C day/18 ± 2°C night, 16 h photoperiod with 300 μmol·m<sup>-2</sup>·s<sup>-1</sup>).

**Table S1.** Evaluation of parameters in Chinese cabbage cultivar ‘Granaat’ under different treatments for clubroot control in greenhouse condition.

| Treatment <sup>1</sup> | Plant Height (cm) | DSI   | Copies of <i>Plasmodiophora brassicae</i> Resting Spores in Soil (g <sup>-1</sup> ) | Soil pH |
|------------------------|-------------------|-------|-------------------------------------------------------------------------------------|---------|
| CK                     | 14.63             | 69.08 | $2.13 \times 10^7$                                                                  | 5.67    |
| T1                     | 14.30             | 67.08 | $2.92 \times 10^7$                                                                  | 5.76    |
| T4                     | 18.33             | 24.14 | $1.09 \times 10^7$                                                                  | 7.46    |
| T9                     | 13.63             | 75.05 | $2.39 \times 10^7$                                                                  | 5.89    |
| T14                    | 18.74             | 1.52  | $2.67 \times 10^5$                                                                  | 5.65    |
| T19                    | 21.10             | 40.40 | $1.59 \times 10^7$                                                                  | 6.73    |
| T22                    | 20.02             | 1.29  | $1.26 \times 10^7$                                                                  | 6.73    |

<sup>1</sup> CK represented the group without treatment; T1, T4, T9, T14, and T19 correspond to treatments with plastic film covering, calcium cyanamide (90 g/m<sup>2</sup>), chloroisobromine cyanuric acid (4.5 g/m<sup>2</sup>), dazomet (37.5 g/m<sup>2</sup>), and ammonium bicarbonate (150 g/m<sup>2</sup>) respectively (22 ± 2°C day/18 ± 2°C night, 16 h photoperiod with 300 μmol·m<sup>-2</sup>·s<sup>-1</sup>). T22 represents ammonium bicarbonate treatment at a higher temperature (32 ± 2°C day/18 ± 2°C night, 16 h photoperiod with 300 μmol·m<sup>-2</sup>·s<sup>-1</sup>).

- No data available

**Table S2.** Measurement of root length of ‘Granaat’ in MS medium with different concentrations of NAA.

| NAA Concentration (mg/L) | Root Length (cm) |
|--------------------------|------------------|
| 0                        | 7.76             |
| 0.04                     | 5.01             |
| 0.08                     | 3.52             |
| 0.12                     | 3.14             |
| 0.16                     | 2.79             |
| 0.20                     | 2.60             |

**Table S3.** Disease index of 'Granaat' under different treatments for clubroot control in field conditions.

| Treatment <sup>1</sup> | DSI   |       |
|------------------------|-------|-------|
|                        | 2020  | 2021  |
| CK                     | 51.27 | 50.51 |
| T1                     | 55.64 | 54.63 |
| T2                     | 23.53 | 25.08 |
| T3                     | 16.85 | 25.74 |
| T4                     | 17.65 | 12.35 |
| T5                     | 19.42 | 27.91 |
| T6                     | 13.63 | 23.78 |
| T7                     | 64.01 | 33.14 |
| T8                     | 67.73 | 28.03 |
| T9                     | 64.02 | 22.59 |
| T10                    | 59.67 | 30.03 |
| T11                    | 64.43 | 24.38 |
| T12                    | 18.42 | 3.65  |
| T13                    | 20.11 | 5.03  |
| T14                    | 19.41 | 1.31  |
| T15                    | 14.02 | 6.86  |
| T16                    | 4.68  | 2.65  |
| T17                    | 54.64 | 44.89 |
| T18                    | 51.41 | 34.16 |
| T19                    | 51.10 | 31.91 |
| T20                    | 52.39 | 29.95 |
| T21                    | 49.92 | 38.01 |

<sup>1</sup> CK represented the group without treatment; T1 was plastic film covering treatment; T2 to T6 were treated with calcium cyanamide at rates of 60, 75, 90, 105, and 120 g/m<sup>2</sup>, respectively; T7 to T11 were treated with chloroisobromine cyanuric acid at rates of 1.5, 3.0, 4.5, 6.0, and 7.5 g/m<sup>2</sup>, respectively; T12 to T16 received dazomet at rates of 27.5, 32.5, 37.5, 42.5, and 47.5 g/m<sup>2</sup>, respectively; and T17 to T21 were treated with ammonium bicarbonate at rates of 120, 135, 150, 165, and 180 , respectively.
